# Supplementary material for: Transient IKK2 activation in astrocytes initiates selective non-cell-autonomous neurodegeneration
Source: Springer Nature journal article supplement (doi:10.1186/s13024-017-0157-0), 2017-02-13

## **Additional file**

### **Transient IKK2 activation in astrocytes initiates selective non-cell-autonomous neurodegeneration**

Michael Lattke, Stephanie N. Reichel, Alexander Magnutzki, Alireza Abaei, Volker Rasche, Paul Walther, Dinis P. Calado Boris Ferger, Thomas Wirth and Bernd Baumann

#### **Contains:**

**Figures S1 – S8.**

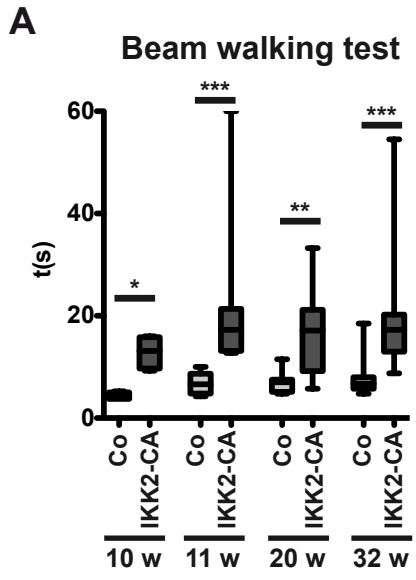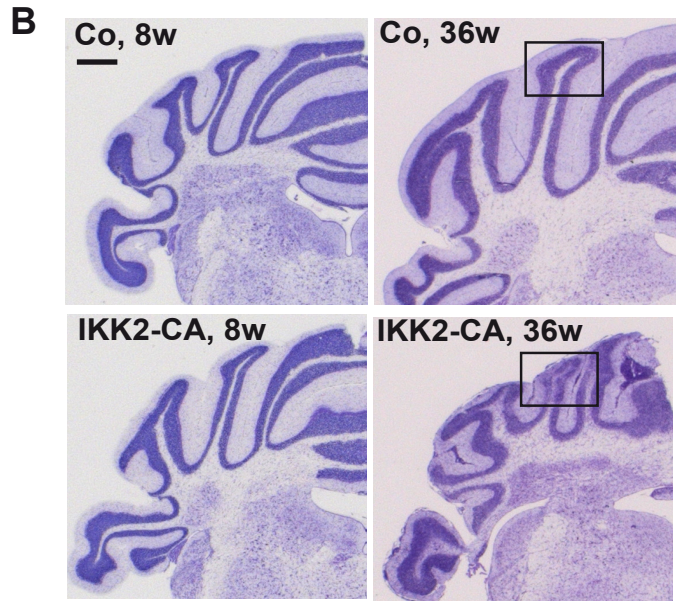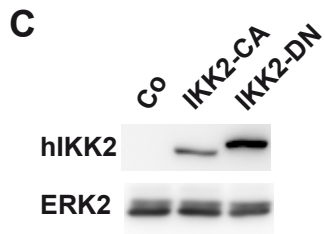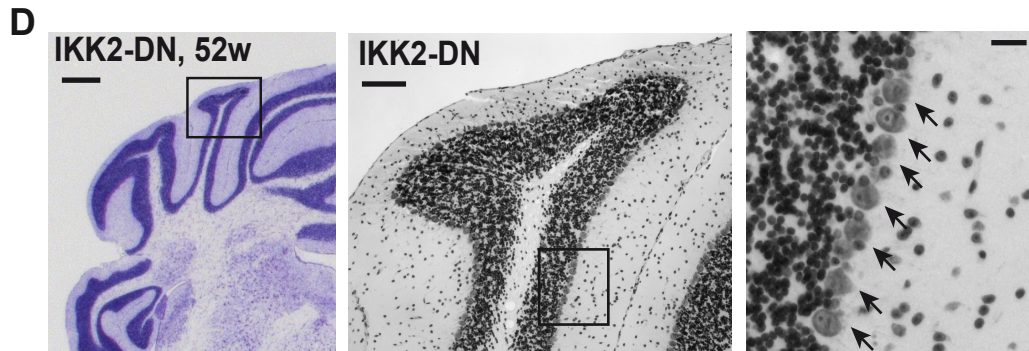

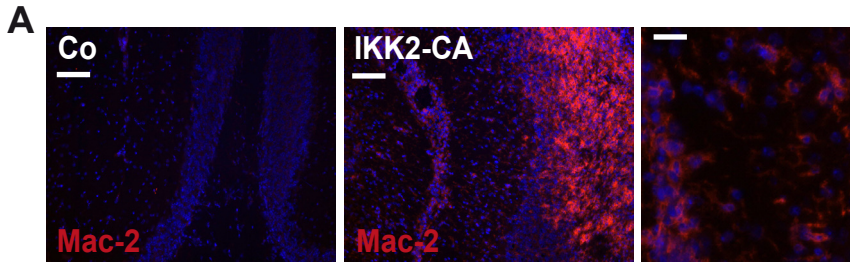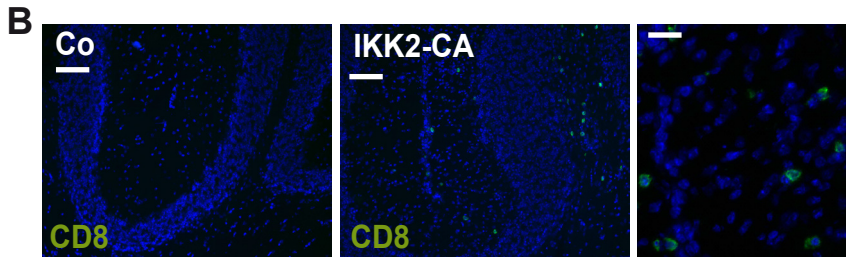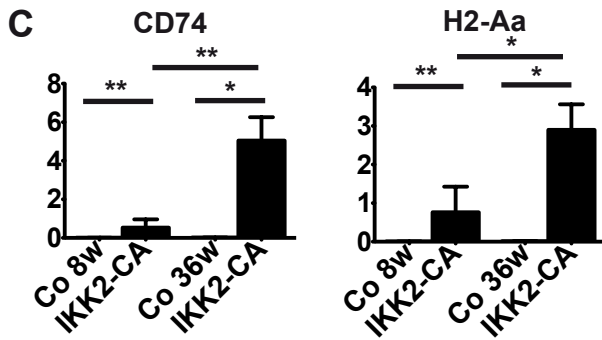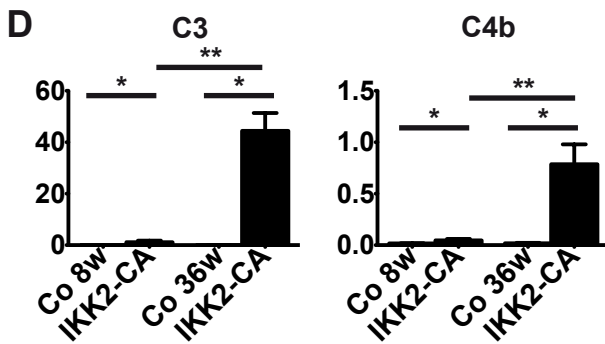

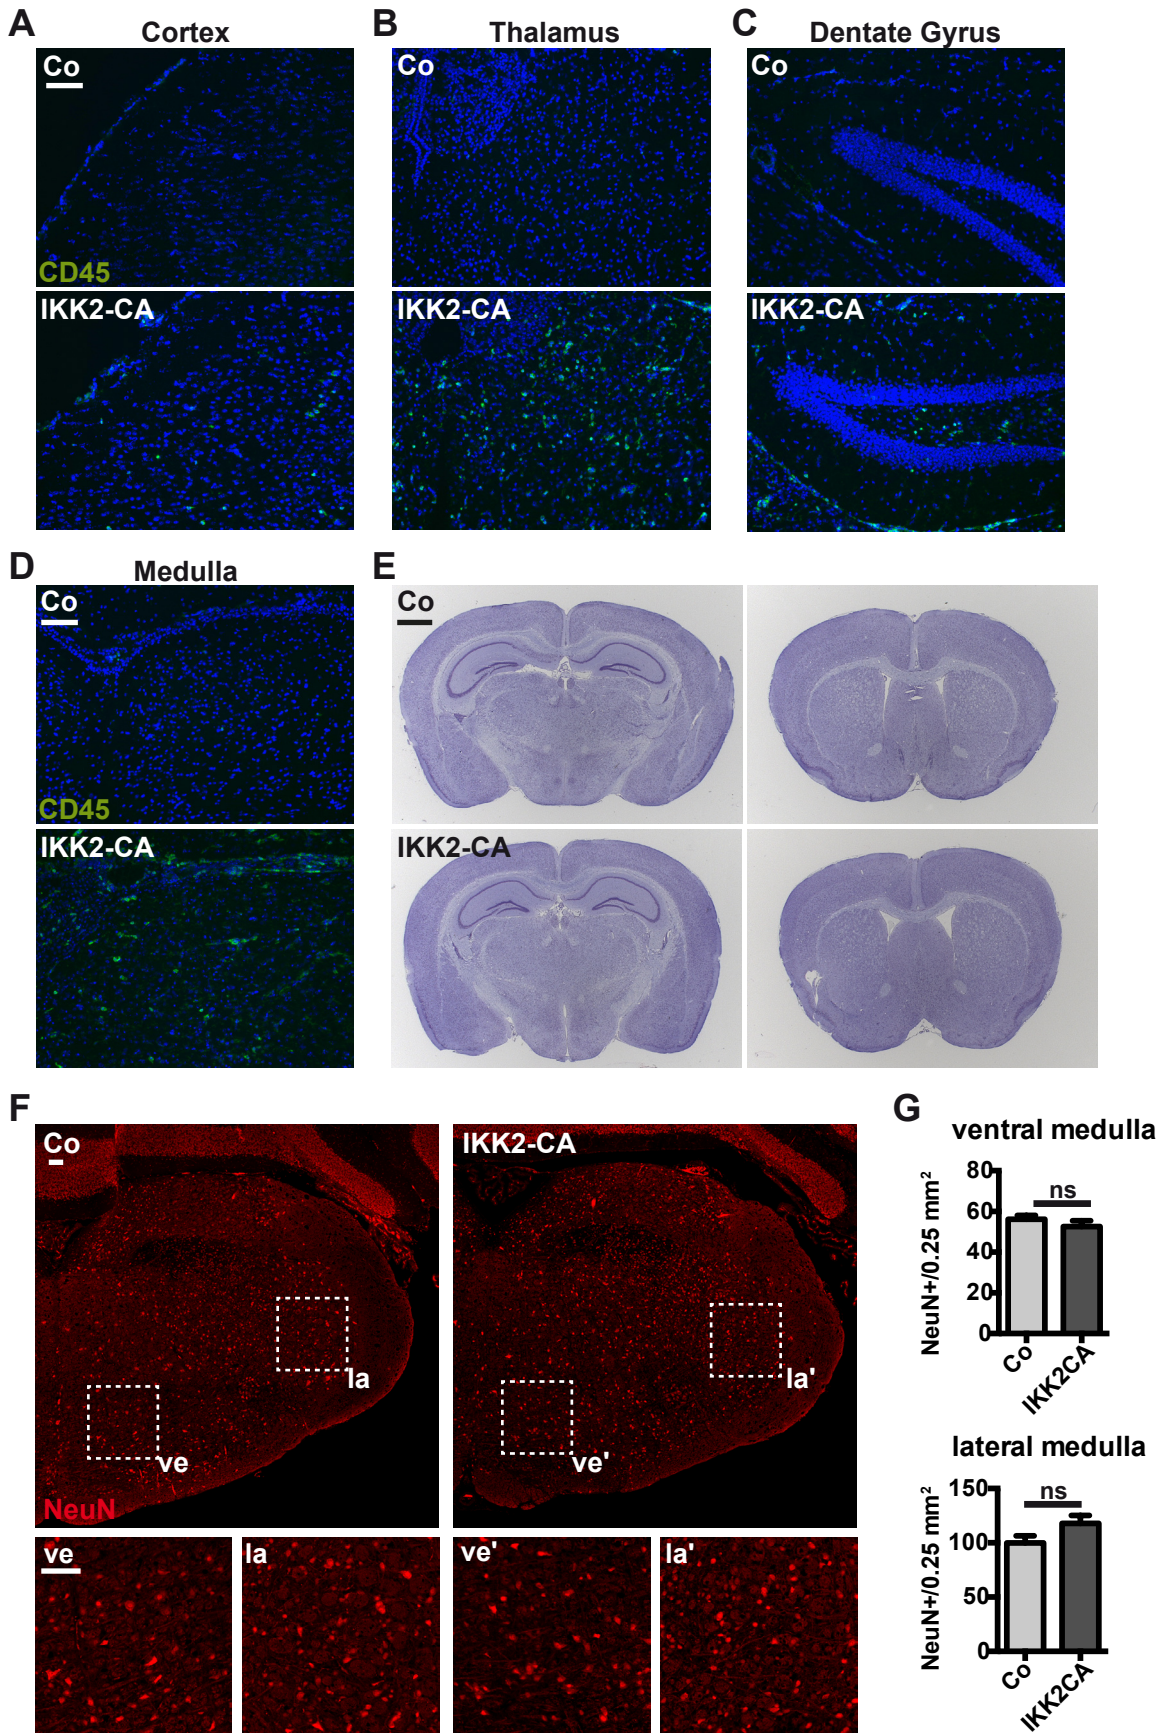

**A**

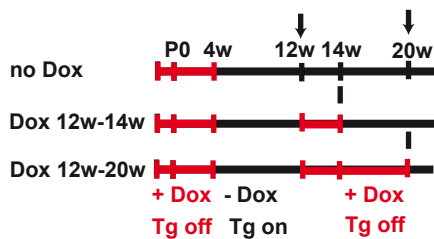

**B**

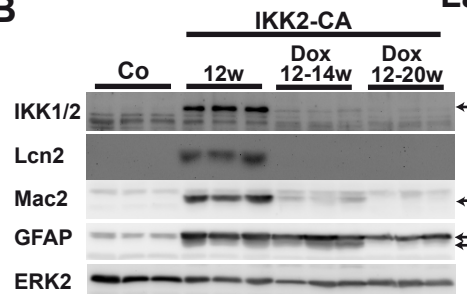

**C**

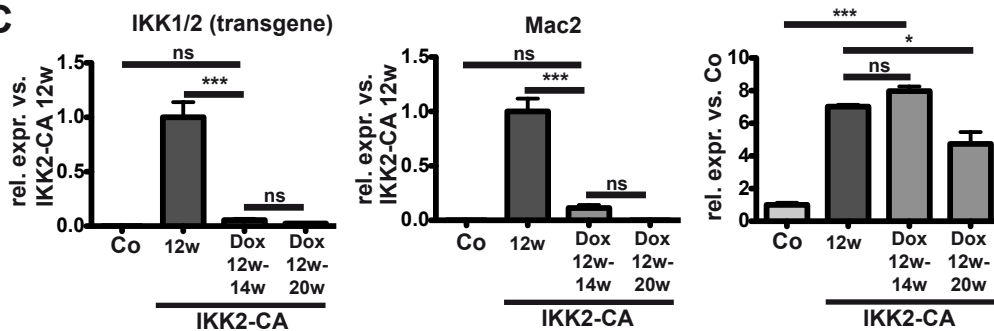

**D**

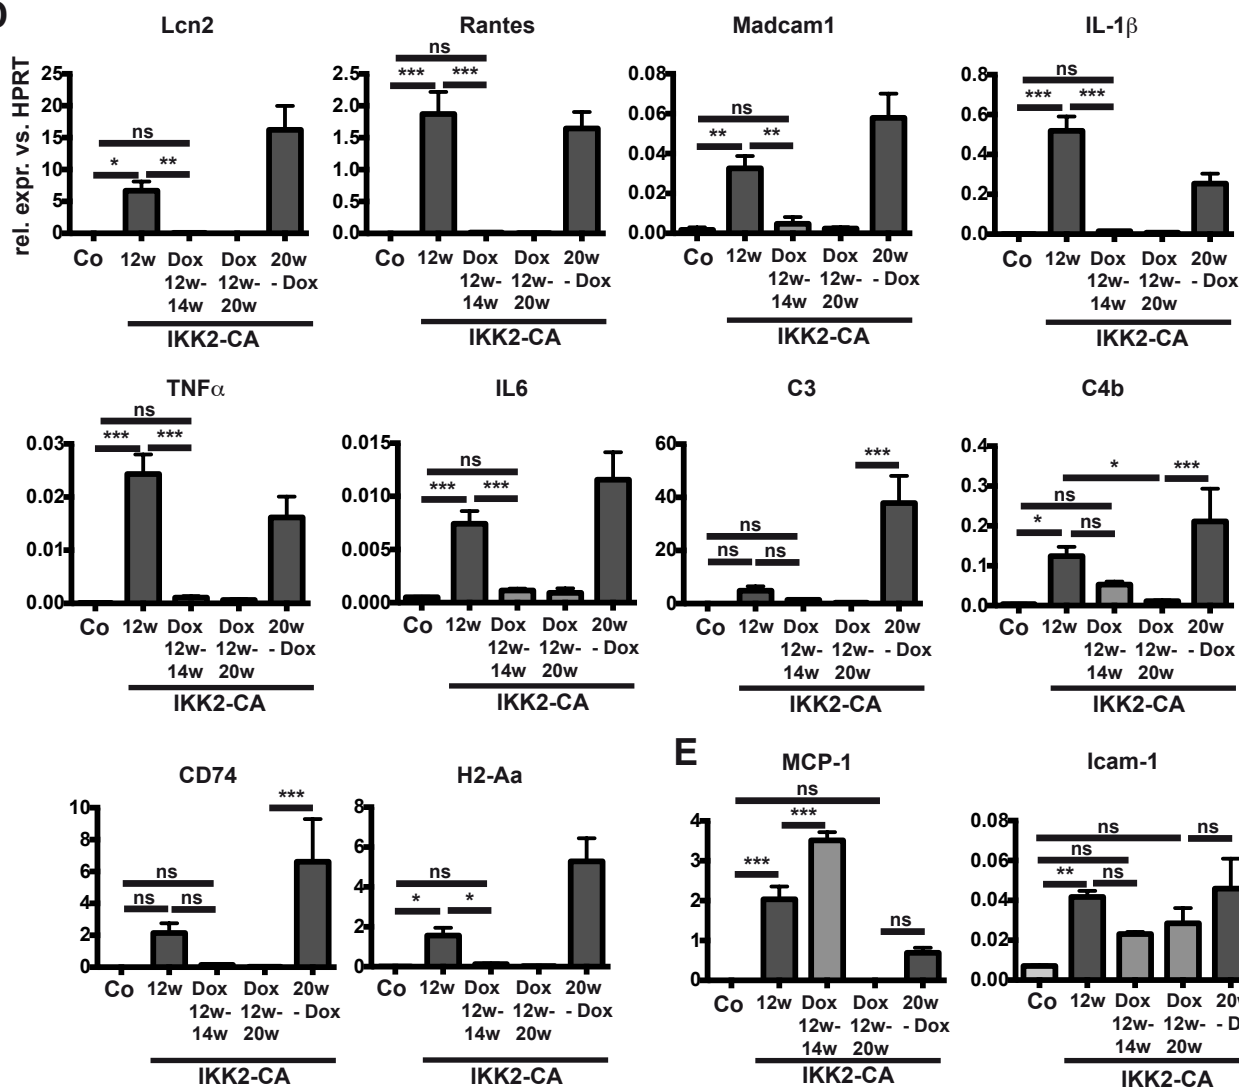

**E**

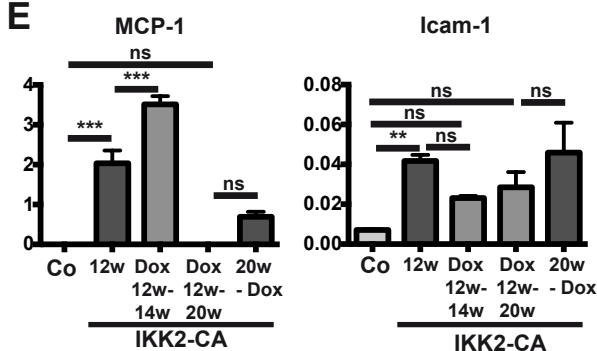

A

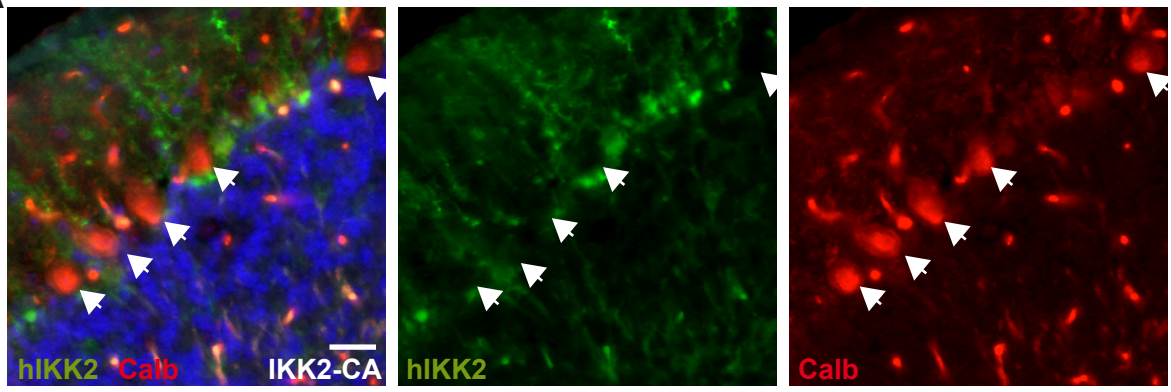

B

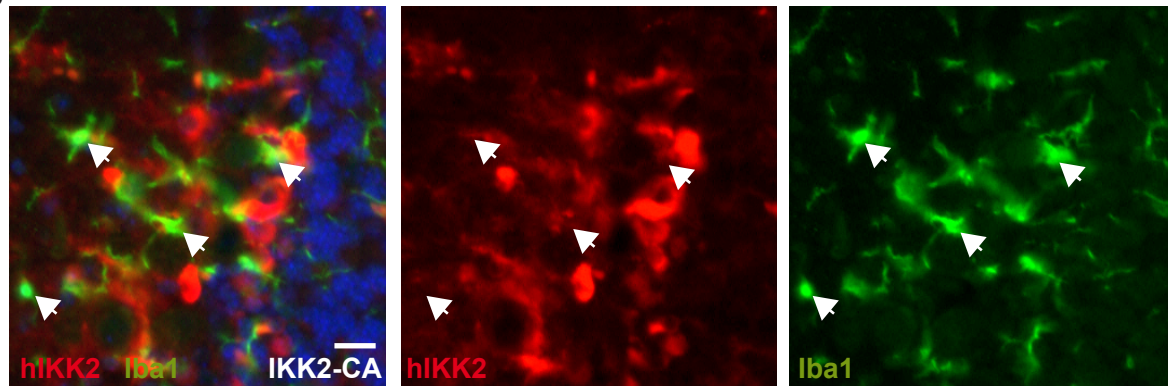

A

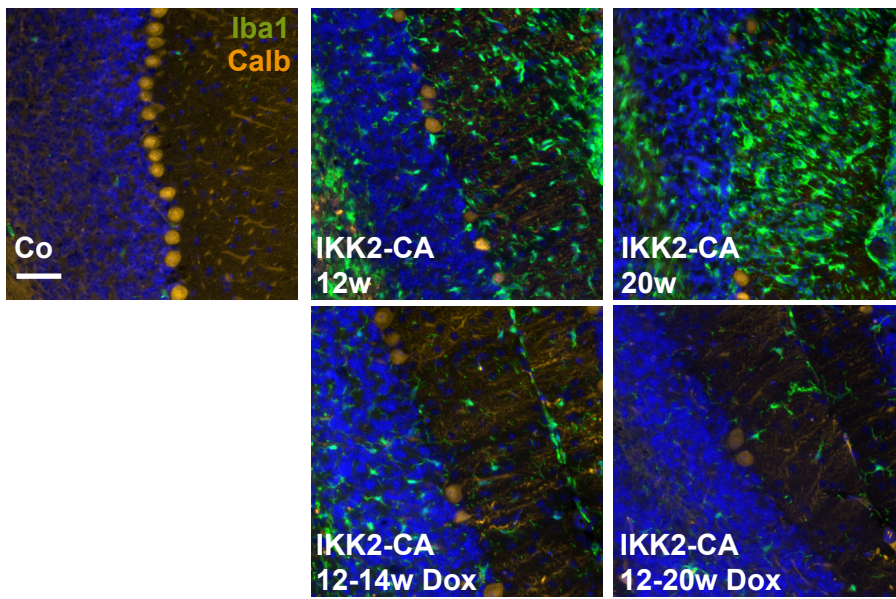

B

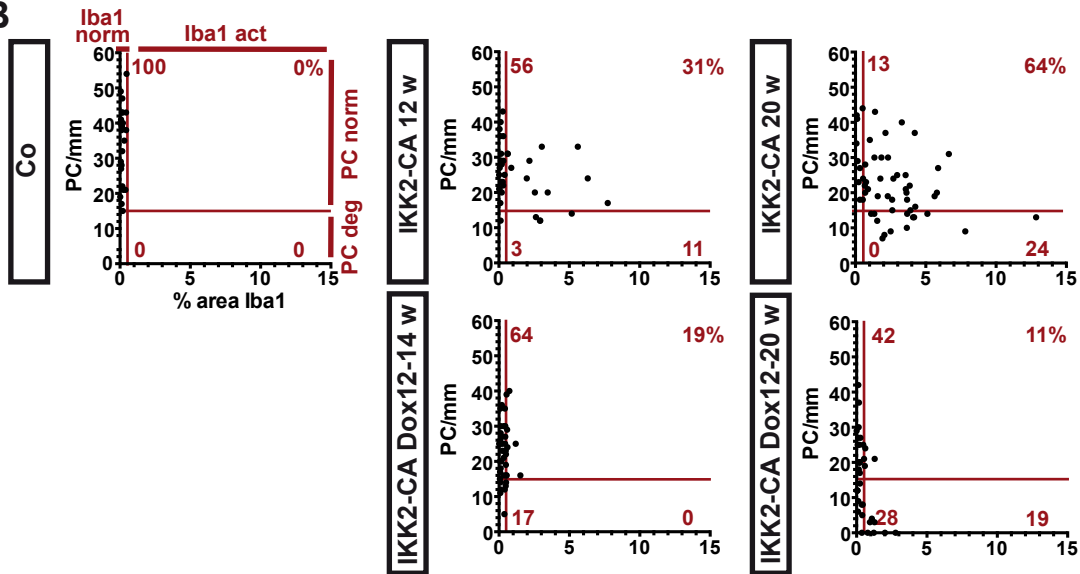

C

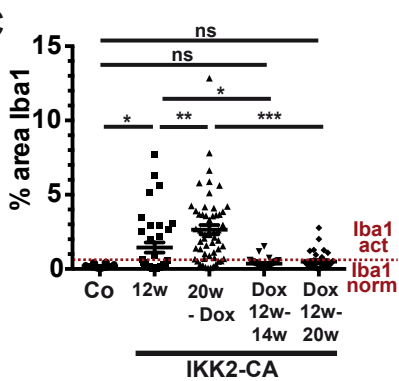

D

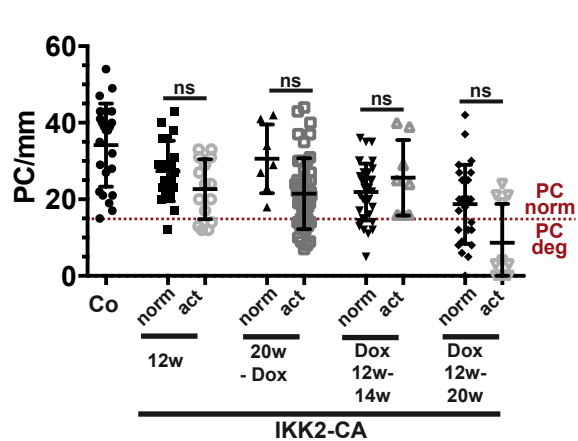

**A** ROSA26 locus (CAG-IKK2-CA-IRES-eGFP)

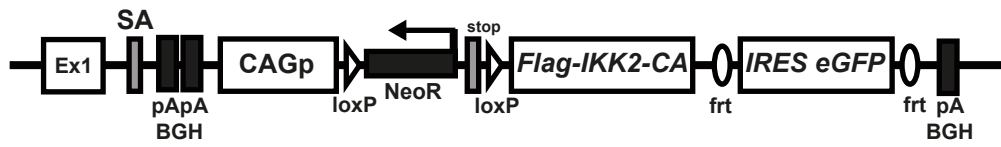

**B**

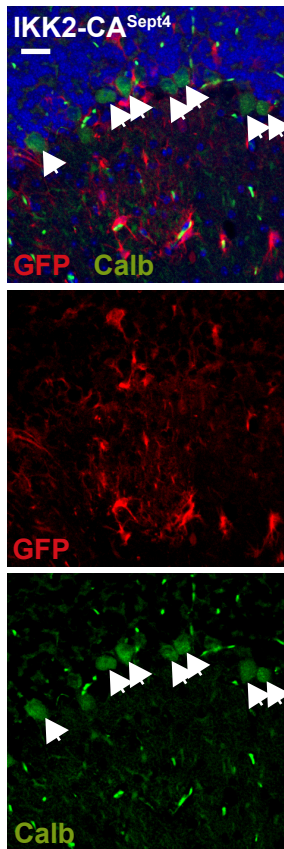

**C**

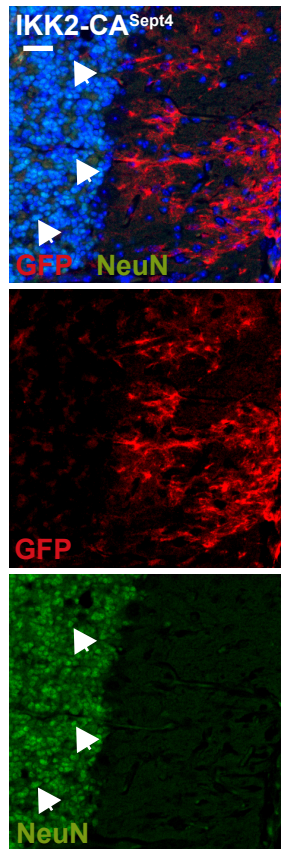

**D**

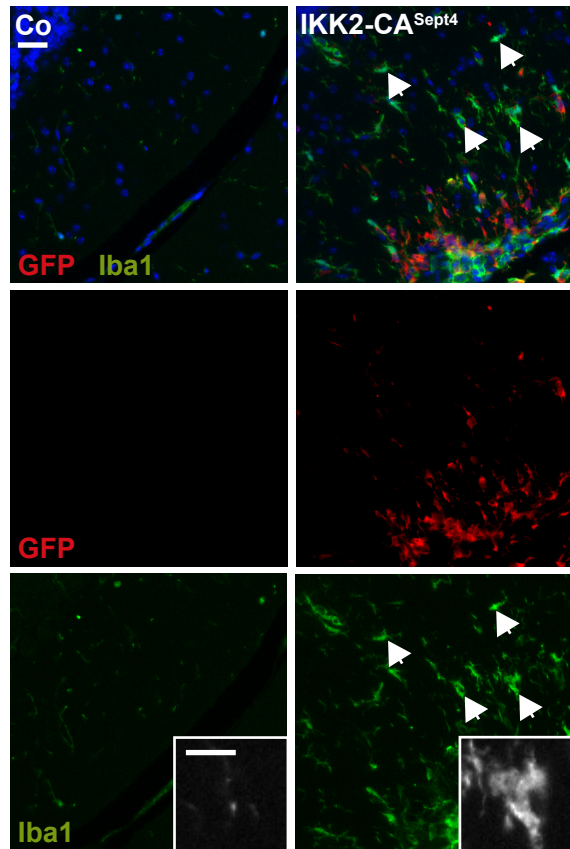

**E**

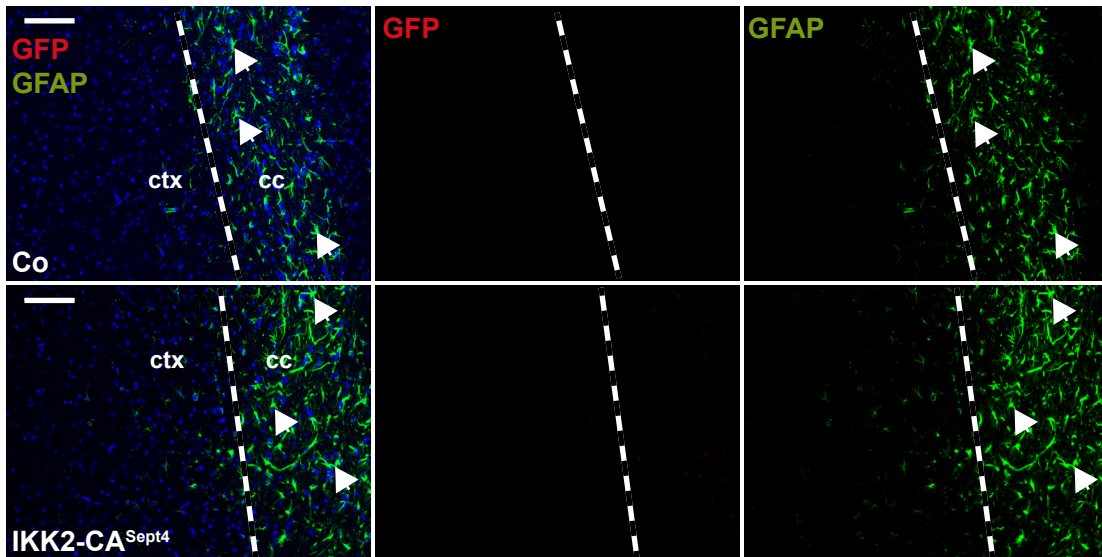



**A**

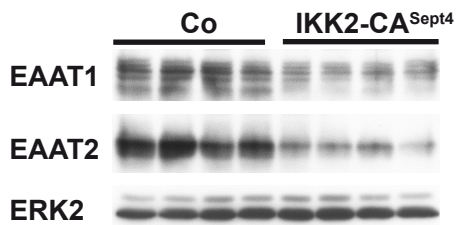

**B**

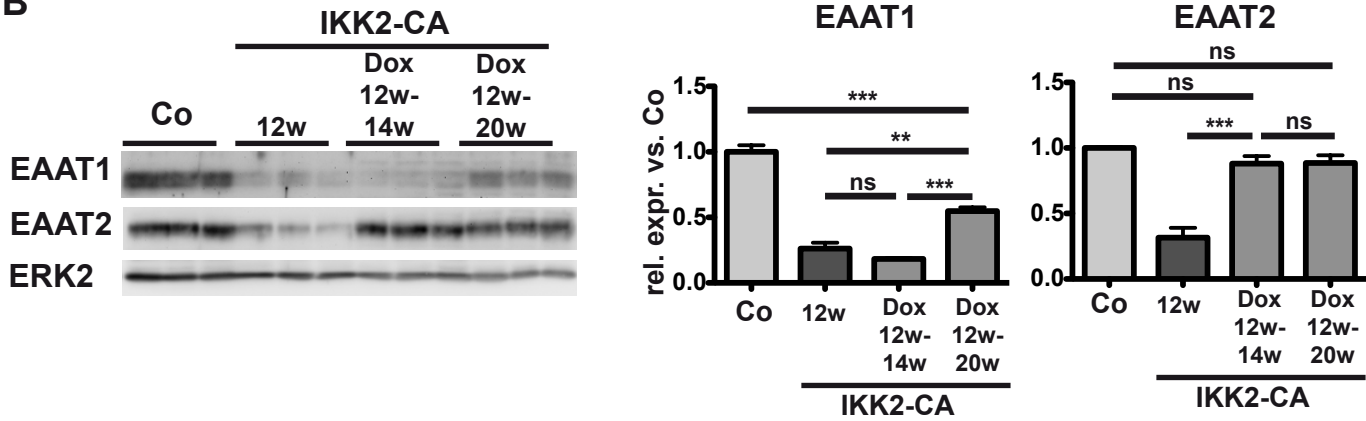

**C**

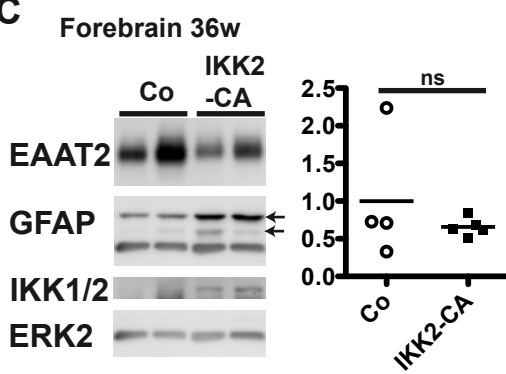

**D**

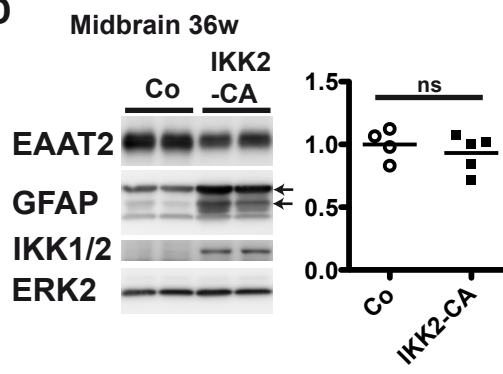

**E**

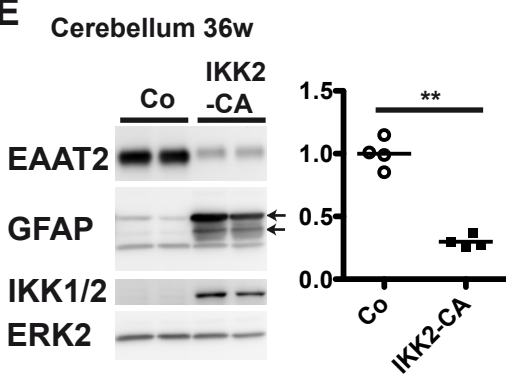

**F**

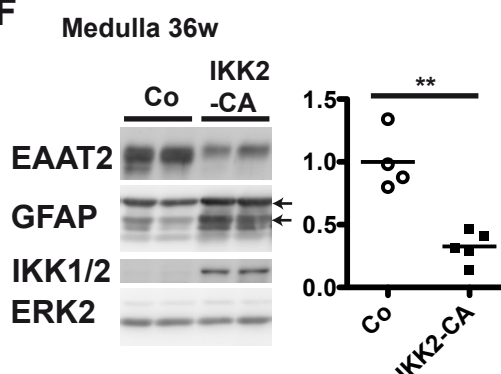

**G**

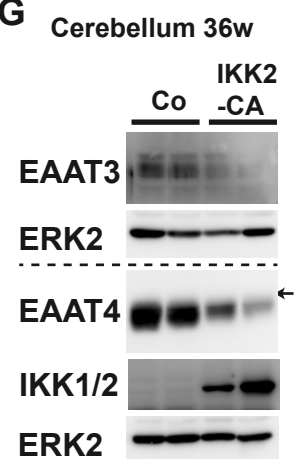

**H**

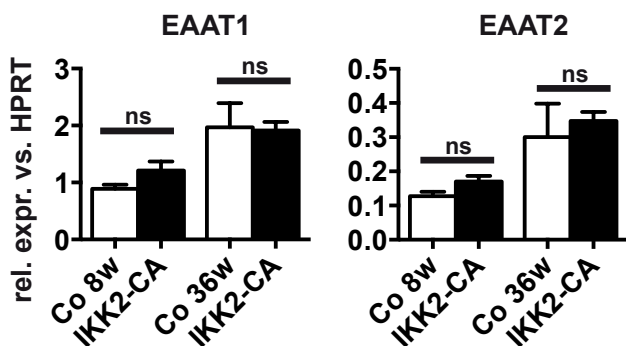

**I**

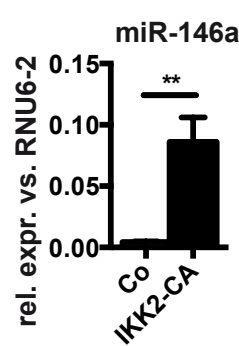

Supplement: MOESM1 [file 12063272]
